# Supplementary material
Source: PubMed Central journal article supplement (PMC8849543)
Supplement: NIHMS1754542-supplement-Supplemental_Digital_Content_2.pdf [file NIHMS1754542-supplement-Supplemental_Digital_Content_2.pdf]

## Appendix 1. International Classification of Diseases-10 Codes Used to Define Pregnancy-Associated Deaths Due to Drug Overdose, Suicide, and Homicide

| Cause              | Description                                                                                                                                                                                                                                                                                                                                                                                                                                                                                                                                                    | Included ICD-10 codes                                                                                                                                                                                                                                                                                                                                                                                                                                                                |
|--------------------|----------------------------------------------------------------------------------------------------------------------------------------------------------------------------------------------------------------------------------------------------------------------------------------------------------------------------------------------------------------------------------------------------------------------------------------------------------------------------------------------------------------------------------------------------------------|--------------------------------------------------------------------------------------------------------------------------------------------------------------------------------------------------------------------------------------------------------------------------------------------------------------------------------------------------------------------------------------------------------------------------------------------------------------------------------------|
| Drug-related death | Comprises unintentional and undetermined-intent deaths due to drug poisoning, drug-induced diseases, and mental/behavioral disorders due to drugs. <sup>56</sup> Drug classes include opiates & narcotics, sedatives/hypnotics, stimulants, and other psychotropics. Category <i>excludes</i> deaths coded as suicides or homicides. We chose a broad definition of drug-related deaths to account for geographic and temporal variability in coroner/medical examiner coding practices, deaths involving multiple drugs, and drug availability and lethality. | X40-X44; Y10-Y14; D52.1, D59.0, D59.2, D61.1, D64.2, E06.4, E16.0, E23.1, E24.2, E27.3, E66.1, G21.1, G24.0, G25.1, G25.4, G25.6, G44.4, G62.0, G72.0, I95.2, J70.2-J70.4, K85.3, L10.5, L27.0, L27.1, M10.2, M32.0, M80.4, M81.4, M83.5, M87.1, R50.2; R78.1-R78.5; F11.0-F11.5, F11.7-F11.9, F12.0-F12.5, F12.7-F12.9, F13.0-F13.5, F13.7-F13.9, F14.0-F14.5, F14.7-F14.9, F15.0-F15.5, F15.7-F15.9, F16.0-F16.5, F16.7-F16.9, F18.0-F18.5, F18.7-F18.9, F19.0-F19.5, F19.7-F19.9. |
| Suicide            | Comprises all deaths with self-harm intent, including via poisoning, firearm, drowning, fire/flame, sharp/blunt object, jumping from high place, motor vehicle crash, suffocation, hanging, or other specified/unspecified means.                                                                                                                                                                                                                                                                                                                              | X60 to X84, Y87.0, or U03<br>*Alternative definition includes Y10-Y19 (poisoning deaths of undetermined intent) as suicide instead of drug-related                                                                                                                                                                                                                                                                                                                                   |
| Homicide           | Comprises all deaths caused by another person, including via firearm, object, pushing from high place or in front of moving object, motor vehicle, neglect/abandonment, or other means. Category includes homicide via poisoning from drugs, which is historically uncommon but is increasing. We will assess the contribution of such drug homicides in our analyses.                                                                                                                                                                                         | X85-X90, X91, X93-X95, Y00-Y09, or Y87.1                                                                                                                                                                                                                                                                                                                                                                                                                                             |

Margerison CE, Roberts MH, Gemmill A, Goldman-Mellor S. Pregnancy-associated deaths due to drugs, suicide, and homicide in the United States, 2010–2019. *Obstet Gynecol* 2022;139.

The authors provided this information as a supplement to their article.

©2022 American College of Obstetricians and Gynecologists.

**Appendix 2. Classification of Pregnancy-Associated Mortality by International Classification of Diseases-10 Code Among Women With Unknown Pregnancy Status**

| Temporality                             | ICD-10 Codes                                                                                                    | Definition                                                                            |
|-----------------------------------------|-----------------------------------------------------------------------------------------------------------------|---------------------------------------------------------------------------------------|
| Pregnancy                               | O001, O009, O019, O021, O035, O036, O039, O063, O068, O069, O077                                                | Pregnancy with abortive outcome                                                       |
|                                         | O210, O223, O225, O229, O235, O244, O249, O269                                                                  | Other maternal disorders predominantly related to pregnancy                           |
|                                         | O364, O441, O459, O460, O468, O469                                                                              | Maternal care related to the fetus and amniotic cavity and possible delivery problems |
|                                         | O622, O711                                                                                                      | Complications of labor and delivery                                                   |
| Postpartum                              | O720, O721                                                                                                      | Postpartum hemorrhage                                                                 |
|                                         | O850                                                                                                            | Puerperal sepsis                                                                      |
|                                         | O903                                                                                                            | Cardiomyopathy in the puerperium                                                      |
|                                         | O908                                                                                                            | Other classification of the puerperium not elsewhere classified                       |
| Pregnant 43 days to 1 year before death | O96                                                                                                             | Death from any cause occurring more than 42 d but less than 1 year from delivery      |
| Timing indeterminate                    | O266, O268, O364, O690, O753, O754, O759, O881, O882, O95, O985, O988, O990, O991, O992, O993, O994, O996, O998 |                                                                                       |

ICD-10, International Classification of Diseases, 10th revision.

Reprinted from Wallace ME, Hoyert D, Williams C, Mendola P. Pregnancy-associated homicide and suicide in 37 US states with enhanced pregnancy surveillance. *Am J Obstet Gynecol.* 2016 Sep;215(3):364.e1-364.e10. doi: 10.1016/j.ajog.2016.03.040. Copyright 2016, with permission from Elsevier.

Margerison CE, Roberts MH, Gemmill A, Goldman-Mellor S. Pregnancy-associated deaths due to drugs, suicide, and homicide in the United States, 2010–2019. *Obstet Gynecol* 2022;139.

The authors provided this information as a supplement to their article.

©2022 American College of Obstetricians and Gynecologists.

**Appendix 3. Number and Percent of Deaths of Female Decedents Aged 15-44 Years, Overall and by Timing Relative to Pregnancy in 32 U.S. States and the District of Columbia, 2010–2019**

| Characteristics of decedent                         | All female deaths<br>ages 15-44 |          | Neither pregnant nor<br>pregnant within 1<br>year of death |          | Timing relative to pregnancy |          |                                     |          |                                      |          | Pregnant within a<br>year, but exact<br>timing unknown |          |
|-----------------------------------------------------|---------------------------------|----------|------------------------------------------------------------|----------|------------------------------|----------|-------------------------------------|----------|--------------------------------------|----------|--------------------------------------------------------|----------|
|                                                     | n                               | column % | n                                                          | column % | Pregnant at time of<br>death |          | Pregnant within<br>42 days of death |          | Pregnant 43-365<br>days before death |          | n                                                      | column % |
| Total deaths                                        | 315,539                         |          | 304,948                                                    |          | 4,105                        |          | 2,845                               |          | 3,427                                |          | 214                                                    |          |
| Age                                                 | n                               | column % | n                                                          | column % | n                            | column % | n                                   | column % | n                                    | column % | n                                                      | column % |
| 15-19                                               | 18,267                          | 5.8%     | 17,665                                                     | 5.8%     | 284                          | 6.9%     | 116                                 | 4.1%     | 195                                  | 5.7%     | <10                                                    | 3.3%     |
| 20-24                                               | 31,508                          | 10.0%    | 9,488                                                      | 9.7%     | 807                          | 19.7%    | 447                                 | 15.7%    | 734                                  | 21.4%    | 32                                                     | 15.0%    |
| 25-29                                               | 41,689                          | 13.2%    | 39,094                                                     | 12.8%    | 977                          | 23.8%    | 648                                 | 22.8%    | 929                                  | 27.1%    | 41                                                     | 19.2%    |
| 30-34                                               | 54,453                          | 17.3%    | 52,037                                                     | 17.1%    | 856                          | 20.9%    | 759                                 | 26.7%    | 760                                  | 22.2%    | 41                                                     | 19.2%    |
| 35-44                                               | 169,622                         | 53.8%    | 166,664                                                    | 54.7%    | 1,181                        | 28.8%    | 875                                 | 30.8%    | 809                                  | 23.6%    | 93                                                     | 43.5%    |
| Race or ethnicity                                   |                                 |          |                                                            |          |                              |          |                                     |          |                                      |          |                                                        |          |
| Non-Hispanic White                                  | 193,334                         | 61.3%    | 187,884                                                    | 61.6%    | 2,130                        | 51.9%    | 1,284                               | 45.1%    | 1,958                                | 57.1%    | 78                                                     | 36.4%    |
| Non-Hispanic Black                                  | 67,757                          | 21.5%    | 64,783                                                     | 21.2%    | 1,137                        | 27.7%    | 913                                 | 32.1%    | 836                                  | 24.4%    | 88                                                     | 41.1%    |
| Hispanic                                            | 40,225                          | 12.7%    | 38,608                                                     | 12.7%    | 645                          | 15.7%    | 472                                 | 16.6%    | 463                                  | 13.5%    | 37                                                     | 17.3%    |
| Non-Hispanic<br>American Indian or<br>Alaska Native | 7,023                           | 2.2%     | 6,788                                                      | 2.2%     | 85                           | 2.1%     | 58                                  | 2.0%     | 86                                   | 2.5%     | <10                                                    | 2.8%     |
| Non-Hispanic Asian or<br>Pacific Islander           | 7,200                           | 2.3%     | 6,885                                                      | 2.3%     | 108                          | 2.6%     | 118                                 | 4.1%     | 84                                   | 2.5%     | <10                                                    | 2.3%     |
| Educational attainment                              |                                 |          |                                                            |          |                              |          |                                     |          |                                      |          |                                                        |          |
| Less than high school                               | 61,462                          | 19.5%    | 59,344                                                     | 19.5%    | 873                          | 21.3%    | 560                                 | 19.7%    | 642                                  | 18.7%    | 43                                                     | 20.1%    |
| High school diploma                                 | 121,727                         | 38.6%    | 117,546                                                    | 38.5%    | 1,661                        | 40.5%    | 1,061                               | 37.3%    | 1,378                                | 40.2%    | 81                                                     | 37.9%    |
| Some college                                        | 84,100                          | 26.7%    | 81,406                                                     | 26.7%    | 1,067                        | 26.0%    | 705                                 | 24.8%    | 872                                  | 25.4%    | 50                                                     | 23.4%    |
| Bachelor's degree or<br>more                        | 42,222                          | 13.4%    | 40,770                                                     | 13.4%    | 455                          | 11.1%    | 474                                 | 16.7%    | 492                                  | 14.4%    | 31                                                     | 14.5%    |
| Unknown                                             | 6,028                           | 1.9%     | 5,882                                                      | 1.9%     | 49                           | 1.2%     | 45                                  | 1.6%     | 43                                   | 1.3%     | <10                                                    | 4.2%     |
| Marital status                                      |                                 |          |                                                            |          |                              |          |                                     |          |                                      |          |                                                        |          |
| Married                                             | 97,772                          | 31.0%    | 93,708                                                     | 30.7%    | 1,410                        | 34.3%    | 1,231                               | 43.3%    | 1,333                                | 38.9%    | 90                                                     | 42.1%    |
| Not married                                         | 217,767                         | 69.0%    | 211,240                                                    | 69.3%    | 2,695                        | 65.7%    | 1,614                               | 56.7%    | 2,094                                | 61.1%    | 124                                                    | 57.9%    |

Margerison CE, Roberts MH, Gemmill A, Goldman-Mellor S. Pregnancy-associated deaths due to drugs, suicide, and homicide in the United States, 2010–2019. *Obstet Gynecol* 2022;139.

The authors provided this information as a supplement to their article.

©2022 American College of Obstetricians and Gynecologists.

#### Appendix 4. Calculations for Underreporting Drug-Related Deaths, Suicide, and Homicide

| Cause of death | a) Observed pregnancy-associated death count | b) Observed pregnancy-associated death ratio | c) Proportion of total if assume level of under-reporting found in Horon & Cheng(16) | d) Expected pregnancy-associated death count ( <i>a/c</i> ) | e) Missed number of deaths ( <i>d - a</i> ) | f) Expected pregnancy-associated death ratio (100,000 x [ <i>d</i> /28,856,437]) | g) Observed % of all pregnancy-associated deaths* | h) Expected % of all pregnancy-associated deaths+ (100*[ <i>d</i> / [11,782 +e1+e2+e3]]) |
|----------------|----------------------------------------------|----------------------------------------------|--------------------------------------------------------------------------------------|-------------------------------------------------------------|---------------------------------------------|----------------------------------------------------------------------------------|---------------------------------------------------|------------------------------------------------------------------------------------------|
| Drug-related   | 1,349                                        | 4.7                                          | .359                                                                                 | 3,758                                                       | e1) 2,409                                   | 13.0                                                                             | 11.4                                              | 23.6                                                                                     |
| Suicide        | 634                                          | 2.2                                          | .429                                                                                 | 1,478                                                       | e2) 844                                     | 5.1                                                                              | 5.4                                               | 9.3                                                                                      |
| Homicide       | 636                                          | 2.2                                          | .425                                                                                 | 1,496                                                       | e3) 860                                     | 5.2                                                                              | 5.4                                               | 9.4                                                                                      |

\*From Table 1

†After accounting for under-reporting in all 3 categories

Margerison CE, Roberts MH, Gemmill A, Goldman-Mellor S. Pregnancy-associated deaths due to drugs, suicide, and homicide in the United States, 2010–2019. *Obstet Gynecol* 2022;139.

The authors provided this information as a supplement to their article.

©2022 American College of Obstetricians and Gynecologists.

**Appendix 5. Count and Ratio of Pregnancy-Associated Deaths by Cause Using Original Estimates, Excluding California and Maryland, and Excluding Women Over 40 Years of Age, 2010–2019**

| Year  | Drug-related deaths |                     |                           | Suicide            |                     |                           | Homicide           |                     |                           |
|-------|---------------------|---------------------|---------------------------|--------------------|---------------------|---------------------------|--------------------|---------------------|---------------------------|
|       | Original estimates  | Excluding CA and MD | Excluding women >40 years | Original estimates | Excluding CA and MD | Excluding women >40 years | Original estimates | Excluding CA and MD | Excluding women >40 years |
|       | Count (ratio)       |                     |                           | Count (ratio)      |                     |                           | Count (ratio)      |                     |                           |
| 2010  | 80 (2.7)            | 66 (2.8)            | 72 (2.4)                  | 56 (1.9)           | 47 (2.0)            | 53 (1.8)                  | 54 (1.8)           | 39 (1.7)            | 52 (1.8)                  |
| 2011  | 108 (3.7)           | 100 (4.3)           | 104 (3.6)                 | 65 (2.2)           | 54 (2.3)            | 60 (2.1)                  | 56 (1.9)           | 47 (2.0)            | 56 (1.9)                  |
| 2012  | 83 (2.8)            | 75 (3.2)            | 79 (2.7)                  | 53 (1.8)           | 44 (1.9)            | 50 (1.7)                  | 44 (1.5)           | 38 (1.6)            | 44 (1.5)                  |
| 2013  | 97 (3.3)            | 80 (3.4)            | 95 (3.3)                  | 57 (2.0)           | 51 (2.2)            | 55 (1.9)                  | 65 (2.2)           | 59 (2.5)            | 63 (2.2)                  |
| 2014  | 99 (3.4)            | 93 (3.9)            | 96 (3.3)                  | 71 (2.4)           | 60 (2.5)            | 64 (2.2)                  | 54 (1.8)           | 48 (2.0)            | 53 (1.8)                  |
| 2015  | 121 (4.1)           | 110 (4.6)           | 115 (3.9)                 | 63 (2.2)           | 52 (2.2)            | 58 (2.0)                  | 45 (1.5)           | 43 (1.8)            | 45 (1.5)                  |
| 2016  | 155 (5.3)           | 135 (5.7)           | 149 (5.1)                 | 66 (2.3)           | 61 (2.6)            | 64 (2.2)                  | 77 (2.6)           | 64 (2.7)            | 73 (2.5)                  |
| 2017  | 184 (6.5)           | 165 (7.2)           | 176 (6.2)                 | 49 (1.7)           | 43 (1.9)            | 47 (1.7)                  | 81 (2.9)           | 71 (3.1)            | 81 (2.9)                  |
| 2018  | 206 (7.4)           | 190 (8.4)           | 197 (7.1)                 | 85 (3.1)           | 73 (3.2)            | 82 (2.9)                  | 78 (2.8)           | 71 (3.1)            | 78 (2.8)                  |
| 2019  | 216 (7.8)           | 199 (8.9)           | 206 (7.5)                 | 69 (2.5)           | 63 (2.8)            | 66 (2.4)                  | 82 (3.0)           | 75 (3.4)            | 82 (3.0)                  |
| Total | 1349 (4.7)          | 1213 (5.2)          | 1289 (4.5)                | 634 (2.2)          | 548 (2.4)           | 599 (2.1)                 | 636 (2.2)          | 555 (2.4)           | 627 (2.2)                 |

Margerison CE, Roberts MH, Gemmill A, Goldman-Mellor S. Pregnancy-associated deaths due to drugs, suicide, and homicide in the United States, 2010–2019. *Obstet Gynecol* 2022;139.

The authors provided this information as a supplement to their article.

©2022 American College of Obstetricians and Gynecologists.

**Appendix 6. Count and Ratio of Pregnancy-Associated Deaths by Cause Using Original Estimates, Excluding California and Maryland, and Excluding Women over 40 Years of Age, 2010–2019**

| Year  | Obstetric deaths   |                     |                           | Other deaths       |                     |                           |
|-------|--------------------|---------------------|---------------------------|--------------------|---------------------|---------------------------|
|       | Original estimates | Excluding CA and MD | Excluding women >40 years | Original estimates | Excluding CA and MD | Excluding women >40 years |
|       | Count (ratio)      |                     |                           | Count (ratio)      |                     |                           |
| 2010  | 618 (20.9)         | 521 (22.0)          | 572 (19.4)                | 263 (8.9)          | 235 (9.9)           | 247 (8.4)                 |
| 2011  | 679 (23.3)         | 586 (25.1)          | 618 (21.2)                | 269 (9.2)          | 232 (9.9)           | 235 (8.1)                 |
| 2012  | 660 (22.6)         | 567 (24.2)          | 597 (20.5)                | 182 (6.2)          | 161 (6.9)           | 180 (6.2)                 |
| 2013  | 728 (25.1)         | 641 (27.5)          | 648 (22.4)                | 213 (7.3)          | 190 (8.1)           | 201 (6.9)                 |
| 2014  | 716 (24.3)         | 619 (26.2)          | 639 (21.7)                | 227 (7.7)          | 202 (8.5)           | 215 (7.3)                 |
| 2015  | 686 (23.4)         | 599 (25.3)          | 620 (21.1)                | 242 (8.2)          | 218 (9.2)           | 237 (8.1)                 |
| 2016  | 718 (24.7)         | 624 (26.6)          | 645 (22.2)                | 189 (6.5)          | 161 (6.9)           | 184 (6.3)                 |
| 2017  | 711 (25.1)         | 613 (26.7)          | 658 (23.2)                | 203 (7.2)          | 175 (7.6)           | 202 (7.1)                 |
| 2018  | 703 (25.2)         | 607 (26.8)          | 634 (22.7)                | 224 (8.0)          | 198 (8.7)           | 215 (7.7)                 |
| 2019  | 770 (28.0)         | 681 (30.4)          | 708 (25.7)                | 162 (5.9)          | 144 (6.4)           | 159 (5.8)                 |
| Total | 6989 (24.2)        | 6058 (26.0)         | 6339 (22.0)               | 2174 (7.5)         | 1916 (8.2)          | 2075 (7.2)                |

Margerison CE, Roberts MH, Gemmill A, Goldman-Mellor S. Pregnancy-associated deaths due to drugs, suicide, and homicide in the United States, 2010–2019. *Obstet Gynecol* 2022;139.

The authors provided this information as a supplement to their article.

©2022 American College of Obstetricians and Gynecologists.

**Appendix 7. Number of Pregnancy-Associated Deaths by Cause and Year, Comparing Original Definition of Drug-Related Deaths and Suicide to Alternative Definition\***

| Measure                           | Pregnancy-associated deaths |         |                         |         | Number of births |
|-----------------------------------|-----------------------------|---------|-------------------------|---------|------------------|
|                                   | Original definition         |         | Alternative definition* |         |                  |
|                                   | Drug-Related                | Suicide | Drug-Related            | Suicide |                  |
| Number of deaths                  |                             |         |                         |         |                  |
| Year                              |                             |         |                         |         |                  |
| 2010                              | 80                          | 56      | 70                      | 66      | 2,954,034        |
| 2011                              | 108                         | 65      | 101                     | 72      | 2,914,824        |
| 2012                              | 83                          | 53      | 78                      | 58      | 2,915,408        |
| 2013                              | 97                          | 57      | 90                      | 64      | 2,898,700        |
| 2014                              | 99                          | 71      | 90                      | 80      | 2,943,675        |
| 2015                              | 121                         | 63      | 110                     | 74      | 2,936,361        |
| 2016                              | 155                         | 66      | 148                     | 73      | 2,911,965        |
| 2017                              | 184                         | 49      | 171                     | 62      | 2,838,136        |
| 2018                              | 206                         | 85      | 196                     | 95      | 2,789,355        |
| 2019                              | 216                         | 69      | 208                     | 77      | 2,753,979        |
| All years                         | 1349                        | 634     | 1262                    | 721     | 28,856,437       |
| Pregnancy-associated death ratio* | 4.7                         | 2.2     | 4.4                     | 2.5     | --               |
| Percent of all deaths             | 11.4%                       | 5.4%    | 10.7%                   | 6.1%    | --               |

$$* \text{Pregnancy-associated death ratio} = \frac{\text{pregnancy-associated deaths}_c}{\text{live births}} \times 100,000$$

\*Alternative definition includes Y10-Y19 (poisoning deaths of undetermined intent) as suicide instead of drug-related.

Margerison CE, Roberts MH, Gemmill A, Goldman-Mellor S. Pregnancy-associated deaths due to drugs, suicide, and homicide in the United States, 2010–2019. *Obstet Gynecol* 2022;139.

The authors provided this information as a supplement to their article.

©2022 American College of Obstetricians and Gynecologists.
